# Supplementary material
Source: Springer Nature journal article supplement (https://www.springermedizin.de/resource/supplementary/12889_2009_2212_MOESM2_ESM.pdf/9484992)

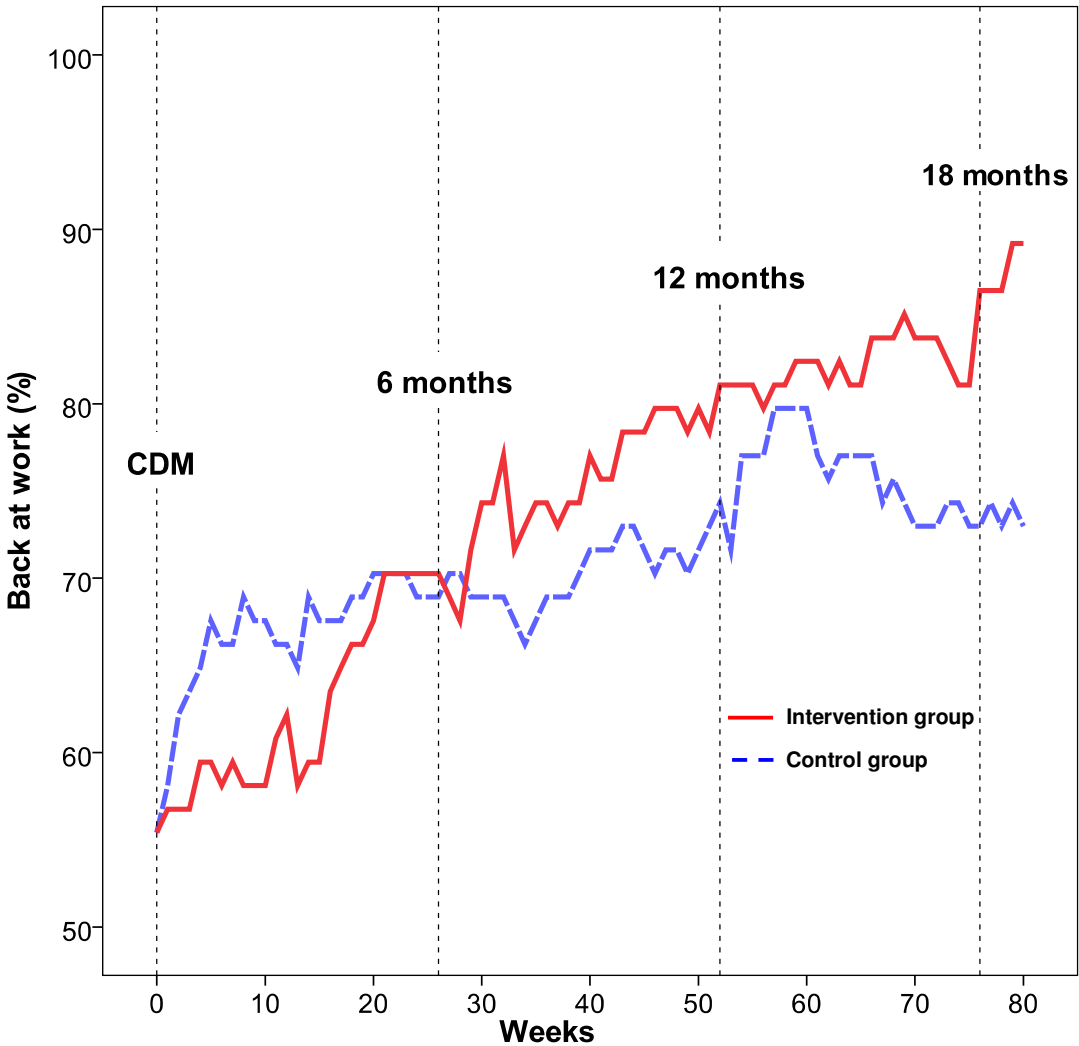

Supplement: MOESM2 [file 9484992]
